# Supplementary material
Source: PubMed Central journal article supplement (PMC2910607)
Supplement: blood-2009-10-249557_1.pdf [file blood-2009-10-249557_1.pdf]

| <b>Gene name</b>                                       | <b>Gene symbol</b> | <b>DMSO vs. RA<br/>(mean fold change)</b> | <b>Q value</b> | <b>DMSO vs. DEAB<br/>(mean fold change)</b> | <b>Q value</b> |
|--------------------------------------------------------|--------------------|-------------------------------------------|----------------|---------------------------------------------|----------------|
| aldehyde dehydrogenase 1 family, member A2             | aldh1a2            | -1.1179                                   | 0              | 1.094764                                    | 0              |
| cellular retinoic acid binding protein 2, a            | crabp2a            | -                                         | -              | -0.63754                                    | 0.01612        |
| cytochrome P450, family 26, subfamily b, polypeptide 1 | cyp26b1            | -1.2826                                   | 0              | 0.821427                                    | 0.03773        |
| dehydrogenase/reductase (SDR family) member 3          | dhrs3              | 2.72691                                   | 0              | -4.52768                                    | 0              |
| homeo box A5a                                          | hoxa5a             | 2.11063                                   | 0              | -2.26006                                    | 0.01612        |
| homeo box B4a                                          | hoxb4a             | 2.01896                                   | 0              | -1.06066                                    | 0.06896        |
| retinoid x receptor, alpha                             | rxra               | 1.6125                                    | 0              | -0.85995                                    | 0.03773        |
| retinoic acid receptor gamma                           | rarg               | -0.9096                                   | 0              | 0.671826                                    | 0.05426        |
| MAD homolog 2 (Drosophila)                             | Smad2              | -                                         | -              | 1.411513                                    | 0.08670        |
